# Supplementary material for: Constraints to Genetic Exchange Support Gene Coadaptation in a Tripartite RNA Virus
Source: PLoS Pathog. 2007 Jan 26;3(1):e8. doi: 10.1371/journal.ppat.0030008 (PMC1781478; doi:10.1371/journal.ppat.0030008)
Supplement: Table S4 — Progenies recovered from total RNA extracts of TSL. Data are number of descendants and frequencies referred to the total of the progeny (between brackets). Genotype distributions with the same letter did not differ at a 95% level of confidence. (65 KB DOC) [file ppat.0030008.st004.doc]

Table S4.- Frequency distributiona of genetic types in progenies from double-inoculations of IA and IB CMV isolates on the systemic host *Nicotiana tabacum* cv. Xanthi-nc. Progenies recovered from total RNA extracts of systemically infected leaves (TSL).

|  | Pair combinations of CMV isolates | | | | | | | |
| --- | --- | --- | --- | --- | --- | --- | --- | --- |
| I | | II | | III | | IV | |
| Genotypeb: | a | | a | | a | | a | |
| 1 AAA.A | 48 | (0.89) | 86 | (0.74) | 103 | (0.86) | 75 | (0.90) |
| 2 BAA.A | 5 | (0.09) | 18 | (0.16) | 14 | (0.11) | 7 | (0.09) |
| 3 ABA.A | 1 | (0.02) | 7 | (0.06) | 2 | (0.02) | 1 | (0.01) |
| 4 AAB.B | 0 |  | 0 |  | 0 |  | 0 |  |
| 5 BBA.A | 0 |  | 5 | (0.04) | 1 | (0.01) | 0 |  |
| 6 BAB.B | 0 |  | 0 |  | 0 |  | 0 |  |
| 7 ABB.B | 0 |  | 0 |  | 0 |  | 0 |  |
| 8 BBB.B | 0 |  | 0 |  | 0 |  | 0 |  |
| Recombinants in RNA3 | 0 |  | 0 |  | 0 |  | 0 |  |
| Allelic value: |  |  |  |  |  |  |  |  |
| *i* = A | 49 | (0.91) | 93 | (0.80) | 105 | (0.87) | 76 | (0.92) |
| *i* = B | 5 | (0.09) | 23 | (0.20) | 15 | (0.13) | 7 | (0.08) |
| *j* = A | 53 | (0.98) | 104 | (0.90) | 117 | (0.97) | 82 | (0.99) |
| *j* = B | 1 | (0.02) | 12 | (0.10) | 3 | (0.03) | 1 | (0.01) |
| *k*1.*k*2 = A | 54 | (1.00) | 116 | (1.00) | 120 | (1.00) | 83 | (1.00) |
| *k*1.*k*2 = B | 0 |  | 0 |  | 0 |  | 0 |  |
| Total (*N*) | 54 |  | 116 |  | 120 |  | 83 |  |
| Fitted modelc |  |  |  |  |  |  |  |  |
| A | 0.59598 ** | | 0.47216 ** | | 0.55962 ** | | 0.60504 ** | |
| B | -1.68640 | | -0.92495 | | -1.38629 | | -1.77978 | |
| A | 0.67446 ** | | 0.58395 ** | | 0.66783 ** | | 0.68103 ** | |
| B | -3.29584 | | -1.57554 | | -2.99573 | | -3.72569 | |
| A | 0.69315 ** | | 0.69315 ** | | 0.69315 ** | | 0.69315 ** | |
| B | -E | | -E | | -E | | -E | |

(a): Data are number of descendents and frequencies referred to the total of the progeny (between brackets). Genotype distributions with the same letter did not differ at a 95% level of confidence.

(b): Genotypes (*ijk*1.*k*2) are defined by the allelic value A (genetic type IA) or B (genetic type IB) at loci *i* (ORF 1a), *j* (ORF 2a) and *k*1.*k*2 (ORFs 3a and CP). The two later are presented together as no recombination was detected.

(c): Parameters in the log-linear model: Ln[*F*(*ijk*1.*k*2)] = Ln[*Fh*(*ijk*1.*k*2)] + *h*, where *h* = *i* + *j* + k + + *ij* + *ik* +*jk* + *ijk* (see Materials and Methods) have been calculated from the random expectation hypothesis *Fh*(ijk) = 0.125 · *N*. Letter E represents a trend to infinity. Significance of parameters at 95% or 99% levels of confidence is indicated by (*) or (**), respectively.
